# Supplementary material for: Efficiently gap-filling reaction networks
Source: Springer Nature journal article supplement (doi:10.1186/1471-2105-15-225), 2014-06-28
Supplement: 12859_2014_6492_MOESM1_ESM.pdf [file 12859_2014_6492_MOESM1_ESM.pdf]

Input: Set  $M$  of candidate reactions  
 A cost  $c_r > 0$  for each reaction  $r$  of  $M$   
 Network  $N$  of reactions to complete  
 Set  $B$  of biomass metabolites to produce

Output: Sets of candidate reactions to add to  $N$

$\alpha \leftarrow 0$   
 $\beta \leftarrow 2|M|$

Loop Until  $|\alpha - \beta| \leq 1$

$\delta \leftarrow \lfloor (\alpha + \beta) / 2 \rfloor$

The objective to maximize is  $\delta f_b - \sum_{r \in M} c_r f_r$

where  $f_b$  is the flux of the biomass reaction  
 $c_r$  is the cost of reaction  $r$   
 $f_r$  is the flux of reaction  $r$

Generate LP with reactions  $N$  and  $M$

Solve LP

If  $f_b > 0$  Then // organism is growing

Let  $R$  be the set of reactions  $r \in M, f_r > 0$

Keep  $R$  in the Solution set

If  $R$  has less reactions than the last iteration

Then  $\beta \leftarrow \delta$

Else  $\alpha \leftarrow \delta$
